# Supplementary material for: Probing the structural changes accompanying a spin crossover transition in a chiral [Fe(ii)(N3O2)(CN)2] macrocycle by X-ray crystallography
Source: Royal Society of Chemistry journal article supplement (doi:10.1039/c5ce01052g), 2015-01-01
Supplement: c5ce01052g1.pdf [file c5ce01052g1.pdf]

## Supporting Information

### Probing the structural changes accompanying spin crossover in a chiral [Fe(II)(N<sub>3</sub>O<sub>2</sub>)(CN)<sub>2</sub>] macrocycle by X-ray crystallography.

Roland T. Acha,<sup>a</sup> and Melanie Pilkington<sup>a\*</sup>

<sup>a</sup> Department of Chemistry, Brock University, 500 Glenridge Ave, St Catharines, Ontario L2S 3A1 Canada.

#### Table of Contents

|                                   |   |
|-----------------------------------|---|
| • S-1: UV-Vis spectroscopy.....   | 2 |
| • S-2: X-ray Crystallography..... | 3 |

## S-1: UV-Vis spectroscopy

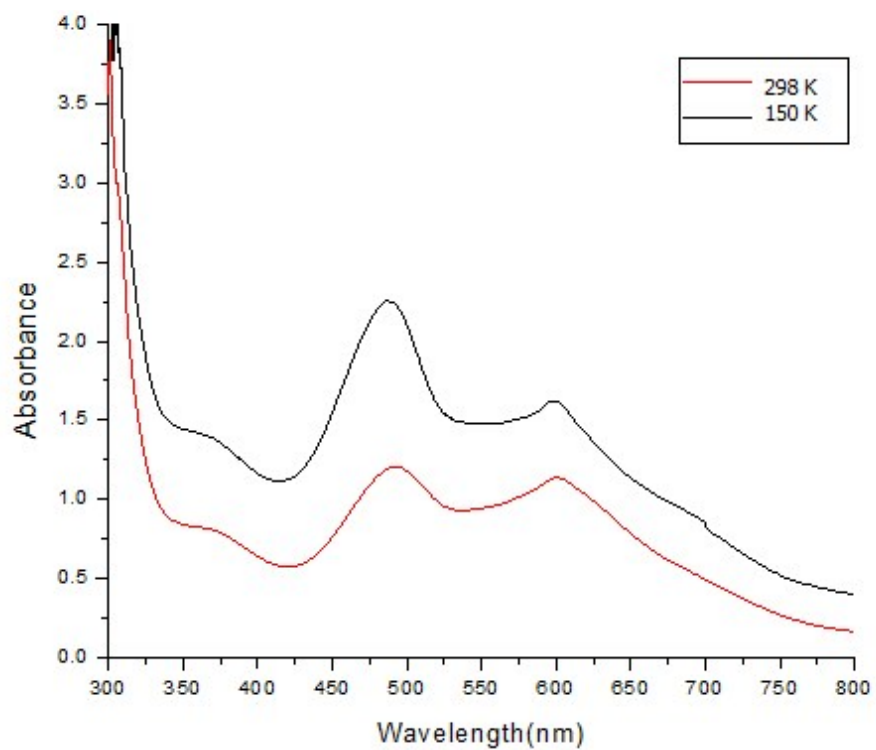

UV-Vis spectra of  $S,S-(\text{PhCH}_2\text{OCH}_2)_2\text{-[Fe}(\text{N}_3\text{O}_2)(\text{CN})_2\text{]}_2$  (**4**) at 298 K (red line) and 150 K (black line).

## S-2: X-ray Crystallography

**Table 1.** Selected bond lengths (Å) for **(4)** at 300 K.

|         |            |         |            |
|---------|------------|---------|------------|
| Fe1—N2  | 1.835 (6)  | C5—C6   | 1.479 (10) |
| Fe1—N1  | 1.913 (5)  | C6—C7   | 1.538 (8)  |
| Fe1—C32 | 1.957 (7)  | C8—C9   | 1.493 (11) |
| Fe1—C33 | 1.965 (7)  | C10—C11 | 1.502 (8)  |
| Fe1—N3  | 2.042 (5)  | C10—C19 | 1.534 (7)  |
| Fe1—O2  | 2.233 (5)  | C12—C13 | 1.518 (10) |
| Fe2—N7  | 1.844 (6)  | C13—C18 | 1.371 (12) |
| Fe2—C66 | 1.958 (8)  | C13—C14 | 1.393 (11) |
| Fe2—N8  | 1.967 (6)  | C18—C17 | 1.375 (12) |
| Fe2—C65 | 1.968 (7)  | C17—C16 | 1.372 (14) |
| Fe2—N6  | 2.041 (6)  | C16—C15 | 1.399 (14) |
| Fe2—O5  | 2.303 (7)  | C15—C14 | 1.369 (12) |
| N1—C30  | 1.302 (10) | C19—C20 | 1.523 (9)  |
| N1—C29  | 1.466 (9)  | C21—C22 | 1.507 (11) |
| N2—C5   | 1.358 (8)  | C22—C23 | 1.389 (12) |
| N2—C1   | 1.380 (9)  | C22—C27 | 1.391 (12) |
| N3—C6   | 1.275 (10) | C23—C24 | 1.372 (12) |
| N3—C8   | 1.484 (9)  | C24—C25 | 1.368 (14) |
| N4—C32  | 1.140 (10) | C25—C26 | 1.364 (14) |
| N5—C33  | 1.153 (10) | C26—C27 | 1.399 (13) |
| N6—C63  | 1.325 (10) | C28—C29 | 1.521 (11) |
| N6—C62  | 1.468 (10) | C30—C31 | 1.515 (9)  |
| N7—C38  | 1.352 (8)  | C34—C35 | 1.402 (11) |
| N7—C34  | 1.360 (9)  | C34—C63 | 1.447 (12) |
| N8—C39  | 1.287 (10) | C35—C36 | 1.380 (12) |
| N8—C41  | 1.470 (10) | C36—C37 | 1.397 (11) |
| N9—C65  | 1.134 (10) | C37—C38 | 1.388 (11) |
| N10—C66 | 1.163 (11) | C38—C39 | 1.481 (9)  |
| O2—C28  | 1.450 (8)  | C39—C40 | 1.492 (10) |
| O2—C19  | 1.461 (8)  | C41—C42 | 1.490 (12) |
| O1—C9   | 1.416 (8)  | C43—C52 | 1.505 (10) |
| O1—C10  | 1.432 (7)  | C43—C44 | 1.530 (9)  |
| O4—C21  | 1.412 (9)  | C45—C46 | 1.493 (11) |
| O4—C20  | 1.431 (8)  | C46—C51 | 1.387 (12) |
| O3—C11  | 1.417 (8)  | C46—C47 | 1.393 (12) |
| O3—C12  | 1.424 (9)  | C47—C48 | 1.370 (11) |
| O5—C42  | 1.433 (10) | C48—C49 | 1.381 (13) |
| O5—C43  | 1.444 (9)  | C49—C50 | 1.350 (15) |
| O6—C61  | 1.370 (10) | C50—C51 | 1.402 (13) |

|        |            |         |            |
|--------|------------|---------|------------|
| O6—C52 | 1.439 (8)  | C52—C53 | 1.527 (9)  |
| O7—C45 | 1.417 (10) | C54—C55 | 1.495 (14) |
| O7—C44 | 1.418 (9)  | C55—C60 | 1.380 (13) |
| O8—C54 | 1.416 (10) | C55—C56 | 1.390 (13) |
| O8—C53 | 1.434 (9)  | C56—C57 | 1.372 (16) |
| C1—C2  | 1.390 (12) | C57—C58 | 1.382 (17) |
| C1—C30 | 1.448 (10) | C58—C59 | 1.352 (15) |
| C2—C3  | 1.385 (11) | C59—C60 | 1.395 (14) |
| C3—C4  | 1.395 (11) | C61—C62 | 1.509 (12) |
| C4—C5  | 1.383 (11) | C63—C64 | 1.467 (10) |

**Table 2.** Selected angles ( ° ) for (**4**) at 300 K.

|             |           |             |           |
|-------------|-----------|-------------|-----------|
| N2—Fe1—N1   | 81.6 (3)  | O3—C11—C10  | 108.8 (5) |
| N2—Fe1—C32  | 93.7 (3)  | O3—C12—C13  | 112.8 (6) |
| N1—Fe1—C32  | 91.0 (3)  | C18—C13—C14 | 119.1 (7) |
| N2—Fe1—C33  | 93.5 (3)  | C18—C13—C12 | 120.8 (7) |
| N1—Fe1—C33  | 92.1 (3)  | C14—C13—C12 | 120.0 (8) |
| C32—Fe1—C33 | 172.5 (3) | C13—C18—C17 | 120.9 (8) |
| N2—Fe1—N3   | 79.4 (3)  | C16—C17—C18 | 120.2 (8) |
| N1—Fe1—N3   | 161.0 (3) | C17—C16—C15 | 119.5 (8) |
| C32—Fe1—N3  | 90.7 (2)  | C14—C15—C16 | 119.8 (9) |
| C33—Fe1—N3  | 88.7 (3)  | C15—C14—C13 | 120.4 (9) |
| N2—Fe1—O2   | 160.2 (2) | O2—C19—C20  | 111.9 (5) |
| N1—Fe1—O2   | 78.6 (2)  | O2—C19—C10  | 108.1 (5) |
| C32—Fe1—O2  | 85.8 (2)  | C20—C19—C10 | 117.3 (5) |
| C33—Fe1—O2  | 88.1 (2)  | O4—C20—C19  | 107.1 (5) |
| N3—Fe1—O2   | 120.4 (2) | O4—C21—C22  | 109.8 (7) |
| N7—Fe2—C66  | 94.0 (3)  | C23—C22—C27 | 119.7 (8) |
| N7—Fe2—N8   | 80.5 (3)  | C23—C22—C21 | 121.6 (7) |
| C66—Fe2—N8  | 91.9 (3)  | C27—C22—C21 | 118.7 (8) |
| N7—Fe2—C65  | 91.9 (3)  | C24—C23—C22 | 119.0 (8) |
| C66—Fe2—C65 | 174.0 (4) | C25—C24—C23 | 122.2 (9) |
| N8—Fe2—C65  | 90.1 (3)  | C26—C25—C24 | 118.9 (8) |
| N7—Fe2—N6   | 79.9 (3)  | C25—C26—C27 | 120.9 (8) |
| C66—Fe2—N6  | 90.3 (3)  | C22—C27—C26 | 119.2 (9) |
| N8—Fe2—N6   | 160.3 (3) | O2—C28—C29  | 107.2 (5) |
| C65—Fe2—N6  | 89.8 (3)  | N1—C29—C28  | 107.6 (6) |
| N7—Fe2—O5   | 156.1 (2) | N1—C30—C1   | 113.2 (6) |
| C66—Fe2—O5  | 82.8 (3)  | N1—C30—C31  | 126.2 (6) |
| N8—Fe2—O5   | 76.0 (3)  | C1—C30—C31  | 120.6 (7) |
| C65—Fe2—O5  | 92.2 (3)  | N4—C32—Fe1  | 177.4 (7) |
| N6—Fe2—O5   | 123.7 (3) | N5—C33—Fe1  | 177.6 (7) |
| C30—N1—C29  | 123.0 (6) | N7—C34—C35  | 120.1 (7) |

|            |           |             |            |
|------------|-----------|-------------|------------|
| C30—N1—Fe1 | 116.8 (5) | N7—C34—C63  | 112.5 (7)  |
| C29—N1—Fe1 | 120.2 (5) | C35—C34—C63 | 127.4 (6)  |
| C5—N2—C1   | 120.9 (6) | C36—C35—C34 | 118.5 (7)  |
| C5—N2—Fe1  | 121.5 (5) | C35—C36—C37 | 120.9 (8)  |
| C1—N2—Fe1  | 117.6 (5) | C38—C37—C36 | 118.4 (7)  |
| C6—N3—C8   | 117.3 (6) | N7—C38—C37  | 120.8 (6)  |
| C6—N3—Fe1  | 114.2 (5) | N7—C38—C39  | 111.7 (6)  |
| C8—N3—Fe1  | 128.5 (5) | C37—C38—C39 | 127.5 (6)  |
| C63—N6—C62 | 118.1 (6) | N8—C39—C38  | 112.0 (6)  |
| C63—N6—Fe2 | 113.9 (5) | N8—C39—C40  | 126.8 (7)  |
| C62—N6—Fe2 | 127.9 (5) | C38—C39—C40 | 121.2 (7)  |
| C38—N7—C34 | 121.2 (7) | N8—C41—C42  | 109.5 (7)  |
| C38—N7—Fe2 | 118.8 (4) | O5—C42—C41  | 107.2 (7)  |
| C34—N7—Fe2 | 120.0 (5) | O5—C43—C52  | 106.7 (6)  |
| C39—N8—C41 | 122.8 (6) | O5—C43—C44  | 107.4 (6)  |
| C39—N8—Fe2 | 117.0 (5) | C52—C43—C44 | 113.1 (5)  |
| C41—N8—Fe2 | 120.2 (5) | O7—C44—C43  | 107.1 (5)  |
| C28—O2—C19 | 112.9 (5) | O7—C45—C46  | 115.7 (8)  |
| C28—O2—Fe1 | 106.4 (4) | C51—C46—C47 | 118.0 (7)  |
| C19—O2—Fe1 | 132.9 (4) | C51—C46—C45 | 120.3 (9)  |
| C9—O1—C10  | 116.7 (5) | C47—C46—C45 | 121.6 (8)  |
| C21—O4—C20 | 112.4 (5) | C48—C47—C46 | 121.4 (7)  |
| C11—O3—C12 | 113.5 (6) | C47—C48—C49 | 119.8 (8)  |
| C42—O5—C43 | 116.7 (6) | C50—C49—C48 | 120.3 (8)  |
| C42—O5—Fe2 | 106.7 (5) | C49—C50—C51 | 120.5 (9)  |
| C43—O5—Fe2 | 134.6 (5) | C46—C51—C50 | 120.0 (9)  |
| C61—O6—C52 | 122.3 (7) | O6—C52—C43  | 104.3 (6)  |
| C45—O7—C44 | 115.7 (8) | O6—C52—C53  | 114.2 (6)  |
| C54—O8—C53 | 110.0 (6) | C43—C52—C53 | 113.4 (6)  |
| N2—C1—C2   | 119.6 (7) | O8—C53—C52  | 109.5 (6)  |
| N2—C1—C30  | 110.7 (7) | O8—C54—C55  | 111.9 (8)  |
| C2—C1—C30  | 129.8 (7) | C60—C55—C56 | 116.4 (9)  |
| C3—C2—C1   | 119.7 (7) | C60—C55—C54 | 124.6 (8)  |
| C2—C3—C4   | 119.9 (8) | C56—C55—C54 | 118.9 (9)  |
| C5—C4—C3   | 119.3 (7) | C57—C56—C55 | 122.4 (10) |
| N2—C5—C4   | 120.6 (6) | C56—C57—C58 | 119.4 (10) |
| N2—C5—C6   | 109.5 (6) | C59—C58—C57 | 120.0 (10) |
| C4—C5—C6   | 129.8 (6) | C58—C59—C60 | 120.1 (10) |
| N3—C6—C5   | 115.3 (6) | C55—C60—C59 | 121.6 (10) |
| N3—C6—C7   | 126.5 (7) | O6—C61—C62  | 107.7 (7)  |
| C5—C6—C7   | 118.3 (7) | N6—C62—C61  | 110.9 (6)  |
| N3—C8—C9   | 110.8 (5) | N6—C63—C34  | 113.6 (6)  |
| O1—C9—C8   | 106.3 (6) | N6—C63—C64  | 124.8 (7)  |

|             |           |             |           |
|-------------|-----------|-------------|-----------|
| O1—C10—C11  | 104.0 (4) | C34—C63—C64 | 121.6 (7) |
| O1—C10—C19  | 113.7 (5) | N9—C65—Fe2  | 176.5 (8) |
| C11—C10—C19 | 112.6 (5) | N10—C66—Fe2 | 178.1 (8) |

**Table 3.** Selected bond lengths (Å) for **(4)** at 150 K.

|         |            |         |            |
|---------|------------|---------|------------|
| Fe1—N2  | 1.835 (6)  | C5—C6   | 1.479 (10) |
| Fe1—N1  | 1.913 (5)  | C6—C7   | 1.538 (8)  |
| Fe1—C32 | 1.957 (7)  | C8—C9   | 1.493 (11) |
| Fe1—C33 | 1.965 (7)  | C10—C11 | 1.502 (8)  |
| Fe1—N3  | 2.042 (5)  | C10—C19 | 1.534 (7)  |
| Fe1—O2  | 2.233 (5)  | C12—C13 | 1.518 (10) |
| Fe2—N7  | 1.844 (6)  | C13—C18 | 1.371 (12) |
| Fe2—C66 | 1.958 (8)  | C13—C14 | 1.393 (11) |
| Fe2—N8  | 1.967 (6)  | C18—C17 | 1.375 (12) |
| Fe2—C65 | 1.968 (7)  | C17—C16 | 1.372 (14) |
| Fe2—N6  | 2.041 (6)  | C16—C15 | 1.399 (14) |
| Fe2—O5  | 2.303 (7)  | C15—C14 | 1.369 (12) |
| N1—C30  | 1.302 (10) | C19—C20 | 1.523 (9)  |
| N1—C29  | 1.466 (9)  | C21—C22 | 1.507 (11) |
| N2—C5   | 1.358 (8)  | C22—C23 | 1.389 (12) |
| N2—C1   | 1.380 (9)  | C22—C27 | 1.391 (12) |
| N3—C6   | 1.275 (10) | C23—C24 | 1.372 (12) |
| N3—C8   | 1.484 (9)  | C24—C25 | 1.368 (14) |
| N4—C32  | 1.140 (10) | C25—C26 | 1.364 (14) |
| N5—C33  | 1.153 (10) | C26—C27 | 1.399 (13) |
| N6—C63  | 1.325 (10) | C28—C29 | 1.521 (11) |
| N6—C62  | 1.468 (10) | C30—C31 | 1.515 (9)  |
| N7—C38  | 1.352 (8)  | C34—C35 | 1.402 (11) |
| N7—C34  | 1.360 (9)  | C34—C63 | 1.447 (12) |
| N8—C39  | 1.287 (10) | C35—C36 | 1.380 (12) |
| N8—C41  | 1.470 (10) | C36—C37 | 1.397 (11) |
| N9—C65  | 1.134 (10) | C37—C38 | 1.388 (11) |
| N10—C66 | 1.163 (11) | C38—C39 | 1.481 (9)  |
| O2—C28  | 1.450 (8)  | C39—C40 | 1.492 (10) |
| O2—C19  | 1.461 (8)  | C41—C42 | 1.490 (12) |
| O1—C9   | 1.416 (8)  | C43—C52 | 1.505 (10) |
| O1—C10  | 1.432 (7)  | C43—C44 | 1.530 (9)  |
| O4—C21  | 1.412 (9)  | C45—C46 | 1.493 (11) |
| O4—C20  | 1.431 (8)  | C46—C51 | 1.387 (12) |
| O3—C11  | 1.417 (8)  | C46—C47 | 1.393 (12) |
| O3—C12  | 1.424 (9)  | C47—C48 | 1.370 (11) |
| O5—C42  | 1.433 (10) | C48—C49 | 1.381 (13) |

|        |            |         |            |
|--------|------------|---------|------------|
| O5—C43 | 1.444 (9)  | C49—C50 | 1.350 (15) |
| O6—C61 | 1.370 (10) | C50—C51 | 1.402 (13) |
| O6—C52 | 1.439 (8)  | C52—C53 | 1.527 (9)  |
| O7—C45 | 1.417 (10) | C54—C55 | 1.495 (14) |
| O7—C44 | 1.418 (9)  | C55—C60 | 1.380 (13) |
| O8—C54 | 1.416 (10) | C55—C56 | 1.390 (13) |
| O8—C53 | 1.434 (9)  | C56—C57 | 1.372 (16) |
| C1—C2  | 1.390 (12) | C57—C58 | 1.382 (17) |
| C1—C30 | 1.448 (10) | C58—C59 | 1.352 (15) |
| C2—C3  | 1.385 (11) | C59—C60 | 1.395 (14) |
| C3—C4  | 1.395 (11) | C61—C62 | 1.509 (12) |
| C4—C5  | 1.383 (11) | C63—C64 | 1.467 (10) |

**Table 4.** Selected bond angles (°) for (**4**) at 100 K

|             |           |             |           |
|-------------|-----------|-------------|-----------|
| N2—Fe1—N1   | 81.6 (3)  | O3—C11—C10  | 108.8 (5) |
| N2—Fe1—C32  | 93.7 (3)  | O3—C12—C13  | 112.8 (6) |
| N1—Fe1—C32  | 91.0 (3)  | C18—C13—C14 | 119.1 (7) |
| N2—Fe1—C33  | 93.5 (3)  | C18—C13—C12 | 120.8 (7) |
| N1—Fe1—C33  | 92.1 (3)  | C14—C13—C12 | 120.0 (8) |
| C32—Fe1—C33 | 172.5 (3) | C13—C18—C17 | 120.9 (8) |
| N2—Fe1—N3   | 79.4 (3)  | C16—C17—C18 | 120.2 (8) |
| N1—Fe1—N3   | 161.0 (3) | C17—C16—C15 | 119.5 (8) |
| C32—Fe1—N3  | 90.7 (2)  | C14—C15—C16 | 119.8 (9) |
| C33—Fe1—N3  | 88.7 (3)  | C15—C14—C13 | 120.4 (9) |
| N2—Fe1—O2   | 160.2 (2) | O2—C19—C20  | 111.9 (5) |
| N1—Fe1—O2   | 78.6 (2)  | O2—C19—C10  | 108.1 (5) |
| C32—Fe1—O2  | 85.8 (2)  | C20—C19—C10 | 117.3 (5) |
| C33—Fe1—O2  | 88.1 (2)  | O4—C20—C19  | 107.1 (5) |
| N3—Fe1—O2   | 120.4 (2) | O4—C21—C22  | 109.8 (7) |
| N7—Fe2—C66  | 94.0 (3)  | C23—C22—C27 | 119.7 (8) |
| N7—Fe2—N8   | 80.5 (3)  | C23—C22—C21 | 121.6 (7) |
| C66—Fe2—N8  | 91.9 (3)  | C27—C22—C21 | 118.7 (8) |
| N7—Fe2—C65  | 91.9 (3)  | C24—C23—C22 | 119.0 (8) |
| C66—Fe2—C65 | 174.0 (4) | C25—C24—C23 | 122.2 (9) |
| N8—Fe2—C65  | 90.1 (3)  | C26—C25—C24 | 118.9 (8) |
| N7—Fe2—N6   | 79.9 (3)  | C25—C26—C27 | 120.9 (8) |
| C66—Fe2—N6  | 90.3 (3)  | C22—C27—C26 | 119.2 (9) |
| N8—Fe2—N6   | 160.3 (3) | O2—C28—C29  | 107.2 (5) |
| C65—Fe2—N6  | 89.8 (3)  | N1—C29—C28  | 107.6 (6) |
| N7—Fe2—O5   | 156.1 (2) | N1—C30—C1   | 113.2 (6) |
| C66—Fe2—O5  | 82.8 (3)  | N1—C30—C31  | 126.2 (6) |
| N8—Fe2—O5   | 76.0 (3)  | C1—C30—C31  | 120.6 (7) |
| C65—Fe2—O5  | 92.2 (3)  | N4—C32—Fe1  | 177.4 (7) |

|            |           |             |            |
|------------|-----------|-------------|------------|
| N6—Fe2—O5  | 123.7 (3) | N5—C33—Fe1  | 177.6 (7)  |
| C30—N1—C29 | 123.0 (6) | N7—C34—C35  | 120.1 (7)  |
| C30—N1—Fe1 | 116.8 (5) | N7—C34—C63  | 112.5 (7)  |
| C29—N1—Fe1 | 120.2 (5) | C35—C34—C63 | 127.4 (6)  |
| C5—N2—C1   | 120.9 (6) | C36—C35—C34 | 118.5 (7)  |
| C5—N2—Fe1  | 121.5 (5) | C35—C36—C37 | 120.9 (8)  |
| C1—N2—Fe1  | 117.6 (5) | C38—C37—C36 | 118.4 (7)  |
| C6—N3—C8   | 117.3 (6) | N7—C38—C37  | 120.8 (6)  |
| C6—N3—Fe1  | 114.2 (5) | N7—C38—C39  | 111.7 (6)  |
| C8—N3—Fe1  | 128.5 (5) | C37—C38—C39 | 127.5 (6)  |
| C63—N6—C62 | 118.1 (6) | N8—C39—C38  | 112.0 (6)  |
| C63—N6—Fe2 | 113.9 (5) | N8—C39—C40  | 126.8 (7)  |
| C62—N6—Fe2 | 127.9 (5) | C38—C39—C40 | 121.2 (7)  |
| C38—N7—C34 | 121.2 (7) | N8—C41—C42  | 109.5 (7)  |
| C38—N7—Fe2 | 118.8 (4) | O5—C42—C41  | 107.2 (7)  |
| C34—N7—Fe2 | 120.0 (5) | O5—C43—C52  | 106.7 (6)  |
| C39—N8—C41 | 122.8 (6) | O5—C43—C44  | 107.4 (6)  |
| C39—N8—Fe2 | 117.0 (5) | C52—C43—C44 | 113.1 (5)  |
| C41—N8—Fe2 | 120.2 (5) | O7—C44—C43  | 107.1 (5)  |
| C28—O2—C19 | 112.9 (5) | O7—C45—C46  | 115.7 (8)  |
| C28—O2—Fe1 | 106.4 (4) | C51—C46—C47 | 118.0 (7)  |
| C19—O2—Fe1 | 132.9 (4) | C51—C46—C45 | 120.3 (9)  |
| C9—O1—C10  | 116.7 (5) | C47—C46—C45 | 121.6 (8)  |
| C21—O4—C20 | 112.4 (5) | C48—C47—C46 | 121.4 (7)  |
| C11—O3—C12 | 113.5 (6) | C47—C48—C49 | 119.8 (8)  |
| C42—O5—C43 | 116.7 (6) | C50—C49—C48 | 120.3 (8)  |
| C42—O5—Fe2 | 106.7 (5) | C49—C50—C51 | 120.5 (9)  |
| C43—O5—Fe2 | 134.6 (5) | C46—C51—C50 | 120.0 (9)  |
| C61—O6—C52 | 122.3 (7) | O6—C52—C43  | 104.3 (6)  |
| C45—O7—C44 | 115.7 (8) | O6—C52—C53  | 114.2 (6)  |
| C54—O8—C53 | 110.0 (6) | C43—C52—C53 | 113.4 (6)  |
| N2—C1—C2   | 119.6 (7) | O8—C53—C52  | 109.5 (6)  |
| N2—C1—C30  | 110.7 (7) | O8—C54—C55  | 111.9 (8)  |
| C2—C1—C30  | 129.8 (7) | C60—C55—C56 | 116.4 (9)  |
| C3—C2—C1   | 119.7 (7) | C60—C55—C54 | 124.6 (8)  |
| C2—C3—C4   | 119.9 (8) | C56—C55—C54 | 118.9 (9)  |
| C5—C4—C3   | 119.3 (7) | C57—C56—C55 | 122.4 (10) |
| N2—C5—C4   | 120.6 (6) | C56—C57—C58 | 119.4 (10) |
| N2—C5—C6   | 109.5 (6) | C59—C58—C57 | 120.0 (10) |
| C4—C5—C6   | 129.8 (6) | C58—C59—C60 | 120.1 (10) |
| N3—C6—C5   | 115.3 (6) | C55—C60—C59 | 121.6 (10) |
| N3—C6—C7   | 126.5 (7) | O6—C61—C62  | 107.7 (7)  |
| C5—C6—C7   | 118.3 (7) | N6—C62—C61  | 110.9 (6)  |



|             |           |             |           |
|-------------|-----------|-------------|-----------|
| N3—C8—C9    | 110.8 (5) | N6—C63—C34  | 113.6 (6) |
| O1—C9—C8    | 106.3 (6) | N6—C63—C64  | 124.8 (7) |
| O1—C10—C11  | 104.0 (4) | C34—C63—C64 | 121.6 (7) |
| O1—C10—C19  | 113.7 (5) | N9—C65—Fe2  | 176.5 (8) |
| C11—C10—C19 | 112.6 (5) | N10—C66—Fe2 | 178.1 (8) |

---
